# Supplementary material for: Enhanced photocatalytic hydrogen evolution efficiency using hollow microspheres of (CuIn)xZn2(1−x)S2 solid solutions
Source: Royal Society of Chemistry journal article supplement (doi:10.1039/c5dt01269d), 2015-01-01
Supplement: c5dt01269d1.pdf [file c5dt01269d1.pdf]

## Supporting Information

### Enhanced photocatalytic hydrogen evolution efficiency using hollow microspheres $(\text{CuIn})_x\text{Zn}_{2(1-x)}\text{S}_2$ solid solutions

Yu Huang,<sup>a</sup> Jun Chen,<sup>a,b,\*</sup> Wei Zou,<sup>a</sup> Linxing Zhang,<sup>a</sup> Lei Hu,<sup>a</sup> Ranbo Yu,<sup>a</sup> Jinxia Deng<sup>a</sup> and Xianran Xing<sup>a</sup>

<sup>a</sup> Department of Physical Chemistry, University of Science and Technology Beijing, Beijing 100083, PR China.

<sup>b</sup> Beijing Key Laboratory of Special Melting and Preparation of High-End Metal Materials, Beijing 100083, PR China.

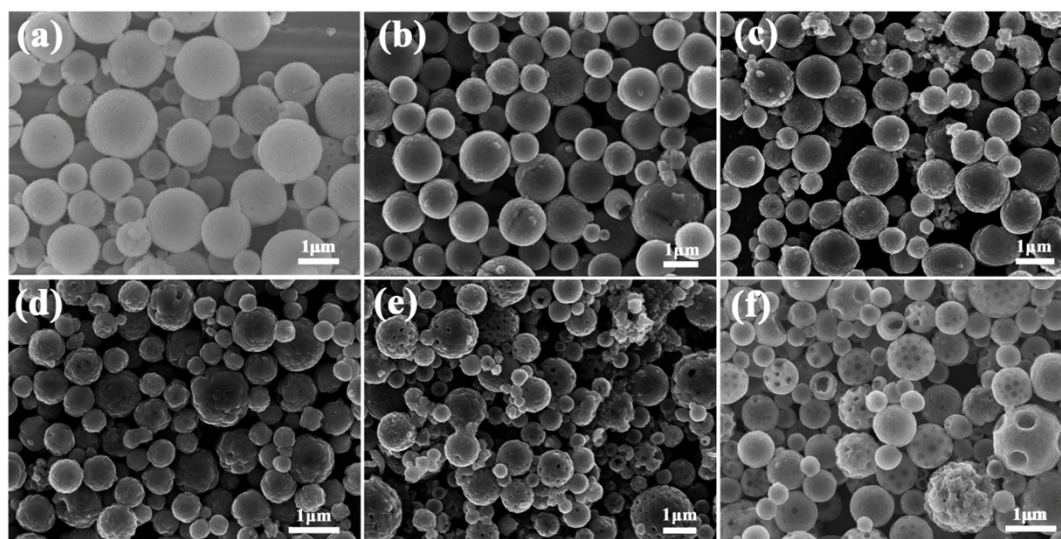

**Figure S1.** SEM images of  $(\text{CuIn})_x\text{Zn}_{2(1-x)}\text{S}_2$  solid solutions; The values of  $x$  were (a) 0, (b) 0.09, (c) 0.2, (d) 0.4, (e) 0.6, and (f) 1. The samples were synthesized at 700 °C.

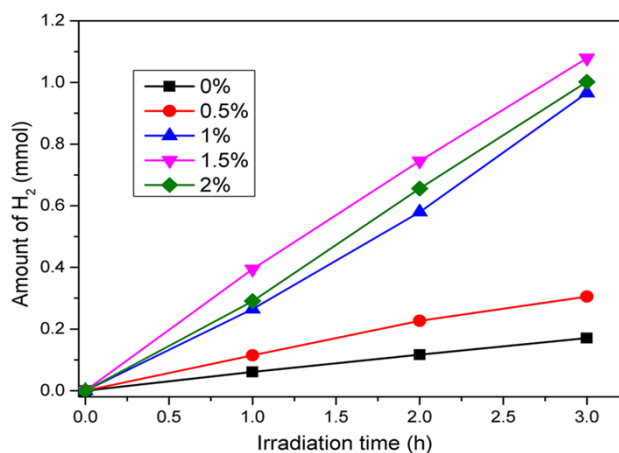

**Figure S2.** The rate of  $\text{H}_2$  evolution upon the amount of Ru cocatalyst loaded on the  $(\text{CuIn})_{0.2}\text{Zn}_{1.6}\text{S}_2$  hollow spheres. Reaction condition: 50 mg  $(\text{CuIn})_{0.2}\text{Zn}_{1.6}\text{S}_2$  catalyst; 100 ml aqueous solution containing 0.35 M  $\text{Na}_2\text{S}$  and 0.25 M  $\text{K}_2\text{SO}_3$ ; light source: 300 W Xe lamp ( $\lambda \geq 420$  nm).

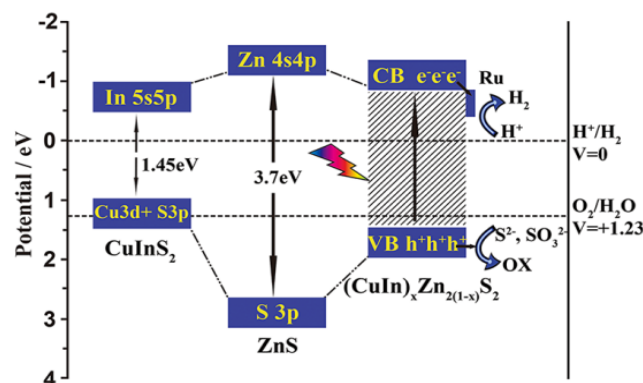

**Figure S3.** Band structure and charge transfer and separation process of  $(\text{CuIn})_x\text{Zn}_{2(1-x)}\text{S}_2$  solid solutions.

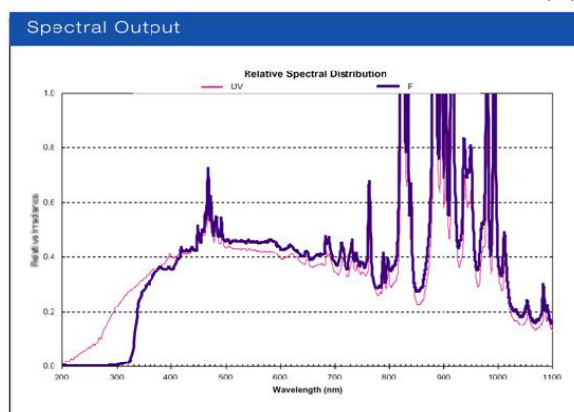

**Figure S4.** The emission spectrum (dark blue one) of the Xe lamp employed in the hydrogen evolution measurement.

| Photocatalyst                                                             | Co-catalyst | Light source                          | Reactant Solution                                                                  | QY     | H <sub>2</sub> evolution |                                      |
|---------------------------------------------------------------------------|-------------|---------------------------------------|------------------------------------------------------------------------------------|--------|--------------------------|--------------------------------------|
|                                                                           |             |                                       |                                                                                    |        | $\mu\text{mol h}^{-1}$   | $\mu\text{mol h}^{-1} \text{g}^{-1}$ |
| $(\text{AgIn})_{0.22}\text{Zn}_{1.56}\text{S}_2$<br>(0.3 g) <sup>4c</sup> | Pt(3 wt%)   | 300 W Xe lamp( $\lambda \geq 420$ nm) | $\text{K}_2\text{SO}_3$ (0.25 M)- $\text{Na}_2\text{S}$ (0.35 M) aqueous solution. | 20 %   | 944                      | 3147                                 |
| $\text{AgInZn}_7\text{S}_9$<br>(0.3 g) <sup>4d</sup>                      | Pt(3 wt%)   | 300 W Xe lamp( $\lambda \geq 420$ nm) | $\text{K}_2\text{SO}_3$ (0.25 M)- $\text{Na}_2\text{S}$ (0.35M) aqueous solution.  | 15 %   | 940                      | 3133                                 |
| $\text{GaGa}_2\text{In}_3\text{S}_8$<br>(0.3 g) <sup>4e</sup>             | Rh(1.5 wt%) | 300 W Xe lamp( $\lambda \geq 420$ nm) | $\text{K}_2\text{SO}_3$ (0.5 M)- $\text{Na}_2\text{S}$ (0.2M) aqueous solution.    | 15 %   | 3200                     | 10667                                |
| $(\text{CuIn})_{0.09}\text{Zn}_{1.82}\text{S}_2$<br>(0.3 g) <sup>4b</sup> | Ru(0.5 wt%) | 300 W Xe lamp( $\lambda \geq 420$ nm) | $\text{K}_2\text{SO}_3$ (0.25 M)- $\text{Na}_2\text{S}$ (0.35 M) aqueous solution. | 12.5 % | 1227                     | 4090                                 |
| $(\text{CuIn})_{0.2}\text{Zn}_{1.6}\text{S}_2$<br>(0.05 g) (This work)    | Ru(1.5 wt%) | 300 W Xe lamp( $\lambda \geq 420$ nm) | $\text{K}_2\text{SO}_3$ (0.25 M)- $\text{Na}_2\text{S}$ (0.35M) aqueous solution.  | 13.6 % | 360                      | 7200                                 |

**Table S1.** The comparison of the performance of the present photocatalyst  $(\text{CuIn})_{0.2}\text{Zn}_{1.6}\text{S}_2$  hollow structures with other materials.
